# Supplementary material for: From the modeling of diadromous species’ marine distributions to the characterization of their current and future marine habitats
Source: Frontiers journal article supplement (doi:10.3389/fmars.2023.1241969), 2023-09-25
Supplement: Data_Sheet_1.docx [file Data_Sheet_1.docx]

Supplementary Material

**From the modelling of diadromous species’ marine distributions to the characterization of their current and future marine habitats**

Navarro Clara1*, Janc Anaïs1, Géraldine Lassalle1,2, Patrick Lambert1,2, Dambrine Chloé1

1INRAE, UE EABX, 33612 Cestas, France

2The common unit Management of Diadromous Fish in their Environment OFB-INRAE-Institut Agro-UPPA

*** Correspondence:** Corresponding Author: [clara_navarro@icloud.com](mailto:clara_navarro@icloud.com)

**Table S1**. Percentage of Allis shad and European flounder presence/absence data from the entire database in each of the five marine sub-regions.

|  | Allis shad | | European flounder | |
| --- | --- | --- | --- | --- |
| Presences | Absences | Presences | Absences |
| IC - Iberian Coast | 0.4 | 0.8 | 0.1 | 0.9 |
| BoB - Bay of Biscay | 74.4 | 15.8 | 3.1 | 34.3 |
| EC - English Channel | 13.8 | 18.8 | 16.9 | 34.4 |
| IS - Celtic/Irish Seas | 4.7 | 25.0 | 8.6 | 4.6 |
| NS - North Sea | 6.7 | 39.6 | 71.2 | 25.8 |
| Total | 100 | 100 | 100 | 100 |
| n | 710 | 710 | 7322 | 7322 |

**Table S2**. Time distribution of presence/absence data used during the calibration process: percentage of Allis shad and European flounder presence/absence data by year.

|  | Allis shad | | European flounder | |
| --- | --- | --- | --- | --- |
| Presences | Absences | Presences | Absences |
| 2006 | 7 | 3.5 | 6.5 | 3.8 |
| 2007 | 4.7 | 5.6 | 9.2 | 4.9 |
| 2008 | 9.4 | 5.1 | 7.8 | 4.8 |
| 2009 | 13.5 | 8.2 | 9.9 | 8.3 |
| 2010 | 6.5 | 9.7 | 10.2 | 10.3 |
| 2011 | 5.9 | 5.8 | 10.2 | 6.9 |
| 2012 | 7.3 | 7.7 | 7 | 7.9 |
| 2013 | 5.8 | 8.6 | 7.1 | 7.3 |
| 2014 | 3.5 | 7.3 | 6.8 | 8.6 |
| 2015 | 6.8 | 9.2 | 6.6 | 9 |
| 2016 | 10.1 | 9.4 | 5.1 | 8.5 |
| 2017 | 7.6 | 10.3 | 5.7 | 8 |
| 2018 | 6.8 | 5.8 | 4.7 | 6.5 |
| 2019 | 5.1 | 3.8 | 2.2 | 5.2 |
| 2020 | / | / | 0.8 | / |
| 2021 | / | / | 0.2 | / |
| Total | 100 | 100 | 100 | 100 |
| n | 710 | 710 | 7322 | 7322 |

**
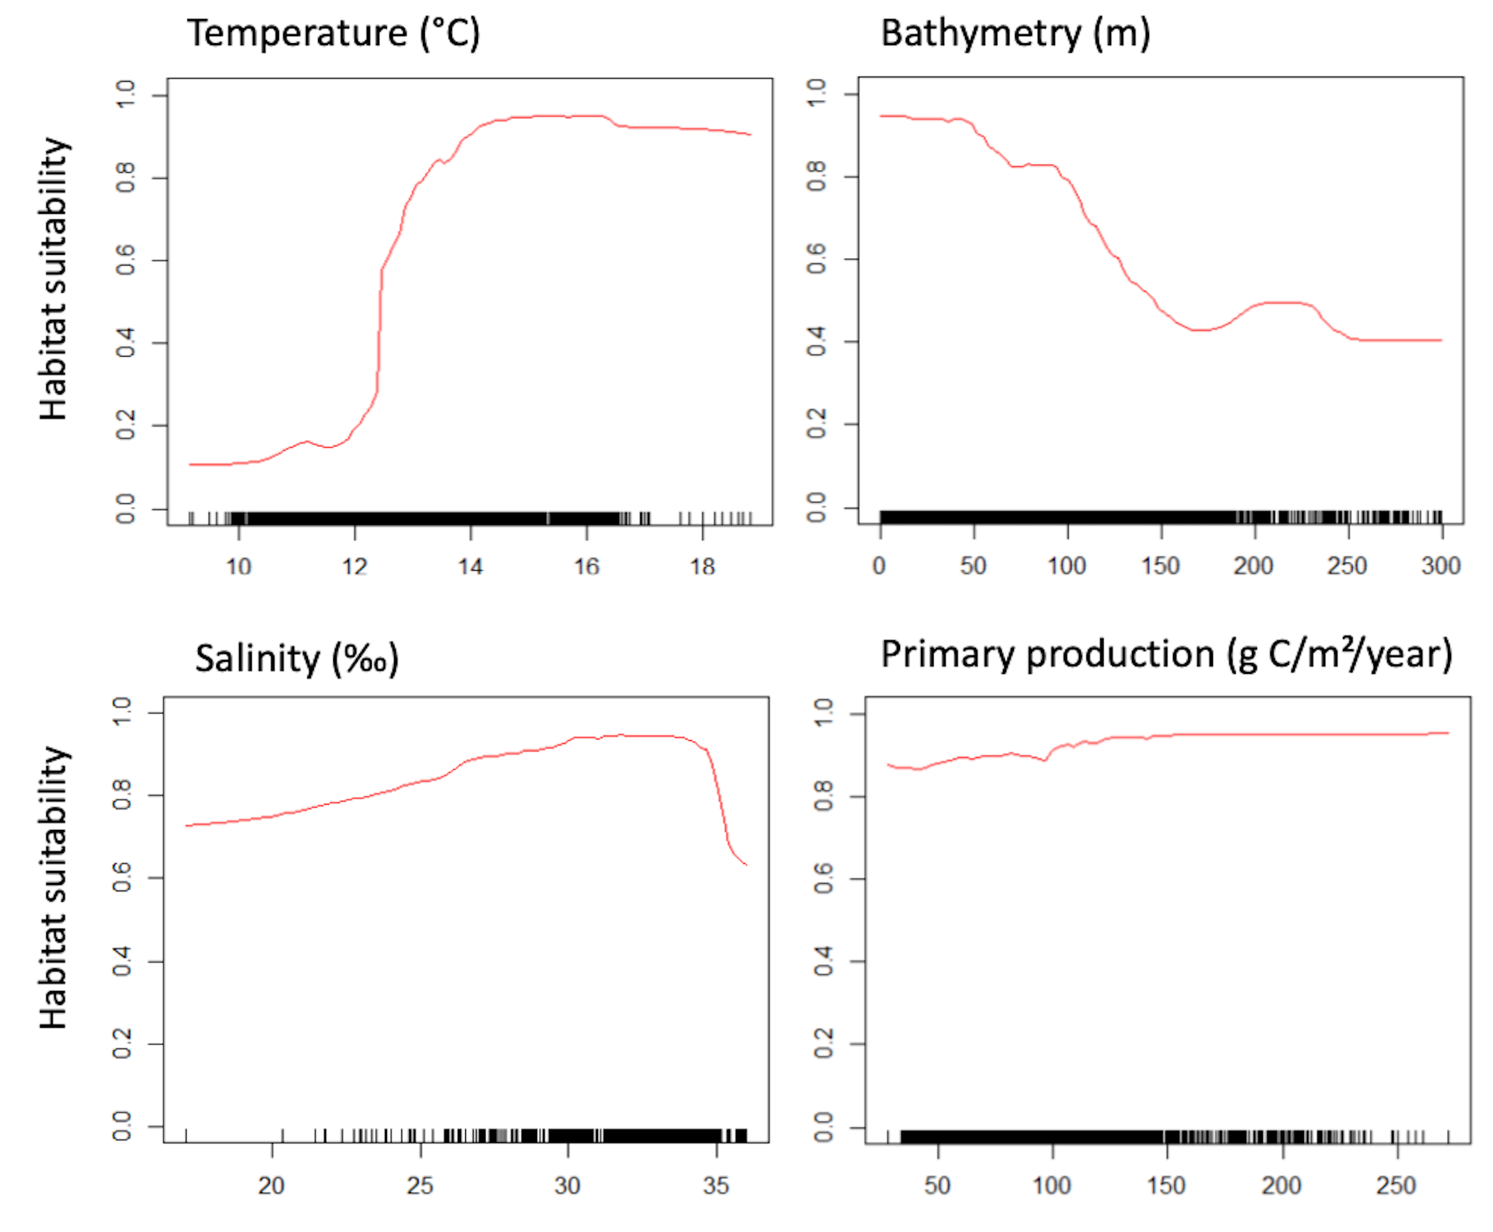
**

**Supplementary Figure 1.** Response curves of the variables retained in the final ensemble modelling for Allis shad: a. temperature, b. bathymetry, c. salinity, and d. bathymetry. The x-axis informed on the values of each variable with tick marks representing the repartition of all the variable values in the ensemble model. The y-axis was the habitat suitability for the species varying from 0 (*i.e.*, variable values were considered the least optimal) to 1 (*i.e*., variable values were considered the most optimal).

**
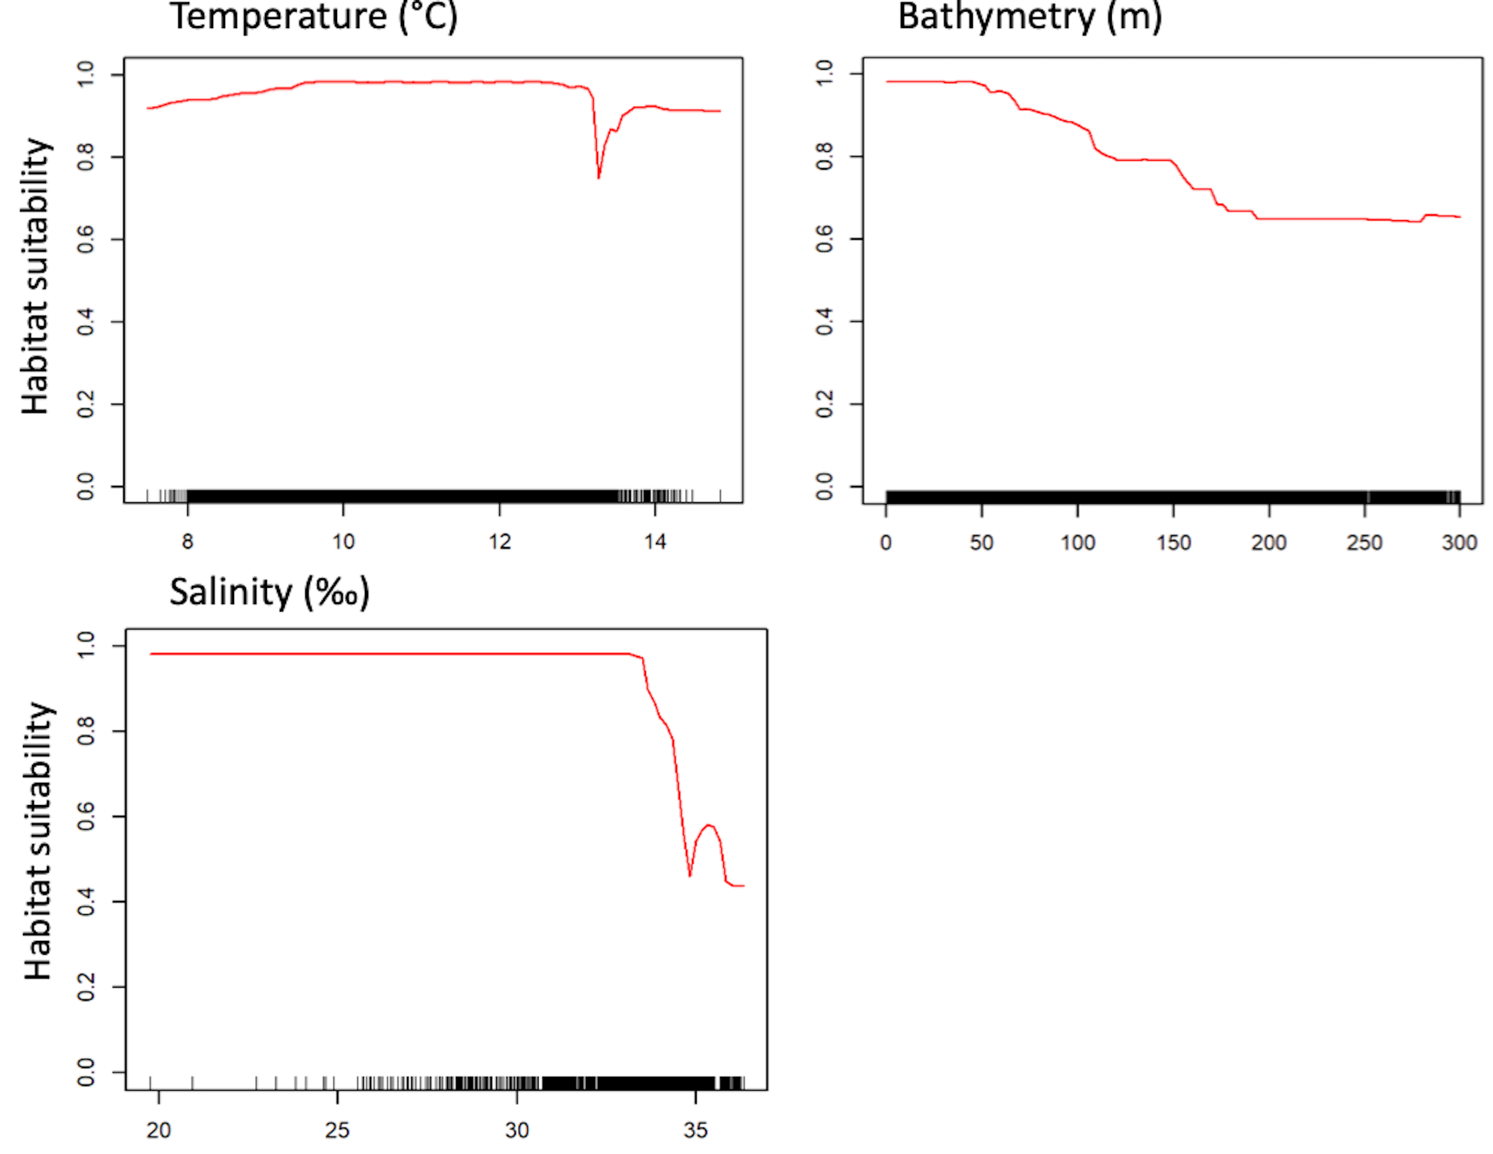
**

**Supplementary Figure 2.** Response curves of the variables retained in the final ensemble modelling for European flounder: a. temperature, b. bathymetry and c. salinity. The x-axis informed on the values of each variable with tick marks representing the repartition of all the variable values in the ensemble model. The y-axis was the habitat suitability for the species varying from 0 (*i.e*., variable values were considered the least optimal) to 1 (i.e., variable values were considered the most optimal). Notably, the drop in temperature by around 13.5°C (a. temperature) could be linked to insufficient data points as a potential factor contributing to the curve's reduced smoothness.
